# Supplementary material for: An electrochemical sensor based on Fe3O4@PANI nanocomposites for sensitive detection of Pb2+ and Cd2+
Source: Royal Society of Chemistry journal article supplement (doi:10.1039/c8ay01245h), 2018-01-01
Supplement: c8ay01245h1.pdf [file c8ay01245h1.pdf]

**An electrochemical sensor based on Fe<sub>3</sub>O<sub>4</sub>@PANI  
nanocomposites for sensitive detection of Pb<sup>2+</sup> and Cd<sup>2+</sup>**

Ying Kong <sup>a</sup>, Tingting Wu <sup>a</sup>, Di Wu <sup>a</sup>, Yong Zhang <sup>b</sup>, Yaoguang Wang <sup>b\*</sup>, Bin Du <sup>a, b</sup>,  
Qin Wei <sup>b</sup>

<sup>a</sup> School of Water Conservancy and Environment, University of Jinan, Jinan 250022,  
China.

<sup>b</sup> Key Laboratory of Interfacial Reaction & Sensing Analysis in Universities of  
Shandong, School of Chemistry and Chemical Engineering, University of Jinan, Jinan  
250022, China

**Corresponding author:** Tel. + 15154109298

E-mail address: wangyaoguang9002@163.com

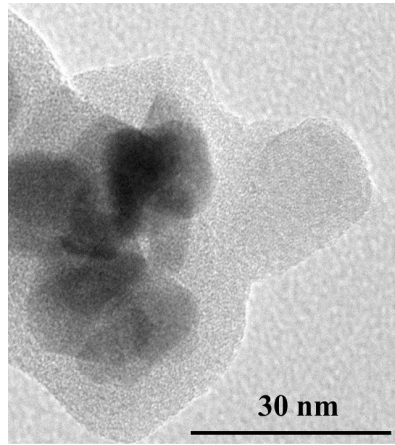

**Figure S1.** HRTEM image of Fe<sub>3</sub>O<sub>4</sub>@PANI

Table S1. Detection of Pb<sup>2+</sup> in real water samples

| Samples    | Added<br>(nmol·L <sup>-1</sup> ) | Found<br>(nmol·L <sup>-1</sup> )  | RSD (%) | Recovery (%) |
|------------|----------------------------------|-----------------------------------|---------|--------------|
| Tap water  | 20.0                             | 20.7, 20.4, 19.5, 20.2, 18.7      | 4.04    | 99.5         |
|            | 100.0                            | 101.6, 105.4, 99.2, 98.7, 102.5   | 2.67    | 101          |
| Lake water | 20.0                             | 21.7, 20.3, 19.8, 21.1, 20.5      | 3.58    | 102          |
|            | 100.0                            | 105.1, 101.7, 107.8, 102.6, 103.7 | 2.29    | 104          |
